# Supplementary material for: The nuclear entry of the aryl hydrocarbon receptor (AHR) relies on the first nuclear localization signal and can be negatively regulated through IMPα/β specific inhibitors
Source: PubMed Central journal article supplement (PMC10640566; doi:10.1038/s41598-023-47066-z), 2023-11-11
Supplement: 41598_2023_47066_MOESM1_ESM.pdf [file 41598_2023_47066_MOESM1_ESM.pdf]

## Supplementary information to

### **The nuclear entry of the aryl hydrocarbon receptor (AHR) relies on the first nuclear localization signal and can be negatively regulated through IMP $\alpha$ / $\beta$ specific inhibitors**

**Rashad Haidar<sup>1-2\*</sup>, Reneh Shabo<sup>1</sup>, Marie Moeser<sup>1</sup>, Andreas Luch<sup>1-2</sup> and Josephine Kugler<sup>1</sup>**

<sup>1</sup> German Federal Institute for Risk Assessment (BfR), Department of Chemical and Product Safety, Berlin, Germany

<sup>2</sup> Institute of Pharmacy, Department of Biology, Chemistry and Pharmacy, Freie Universität Berlin, Berlin, Germany

\* Correspondence should be addressed to [Rashad.Haidar@bfr.bund.de](mailto:Rashad.Haidar@bfr.bund.de)

## Supplementary Figures

a

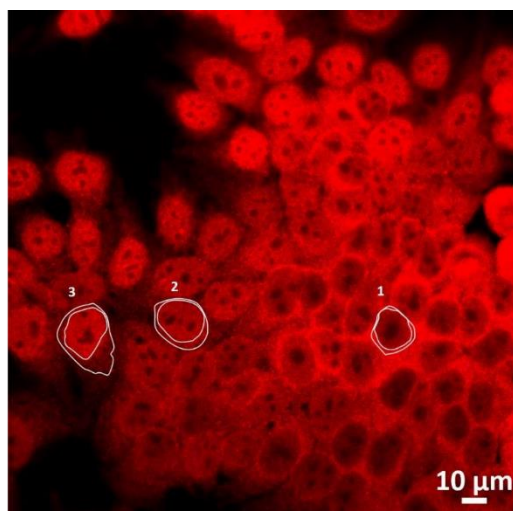

| Name           | Area<br>nm <sup>2</sup> | Fluorescence<br>Intensity |
|----------------|-------------------------|---------------------------|
| Nucleus (1)    | 1,79735E+08             | 28,40085                  |
| Whole Cell (1) | 2,30214E+08             | 32,49268                  |
| Nucleus (2)    | 2,43866E+08             | 30,58789                  |
| Whole Cell (2) | 3,41581E+08             | 29,94433                  |
| Nucleus (3)    | 2,44534E+08             | 34,81347                  |
| Whole Cell (3) | 4,52608E+08             | 29,06058                  |

| Cell | Nucleus  | Whole Cell | Relative nucleus<br>intensity |
|------|----------|------------|-------------------------------|
| 1    | 28,40085 | 32,49268   | 0,874069                      |
| 2    | 30,58789 | 29,94433   | 1,021492                      |
| 3    | 34,81347 | 29,06058   | 1,197962                      |

b

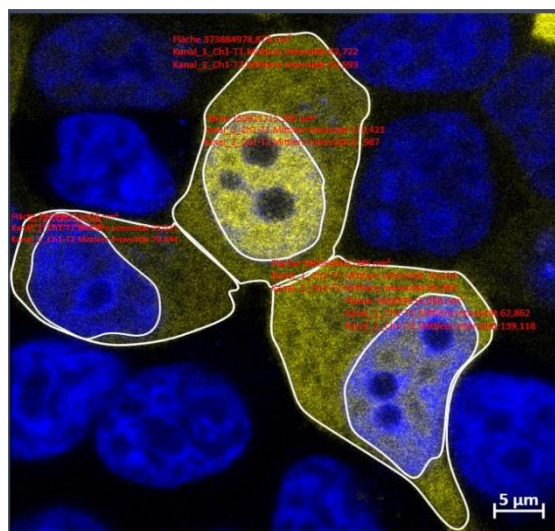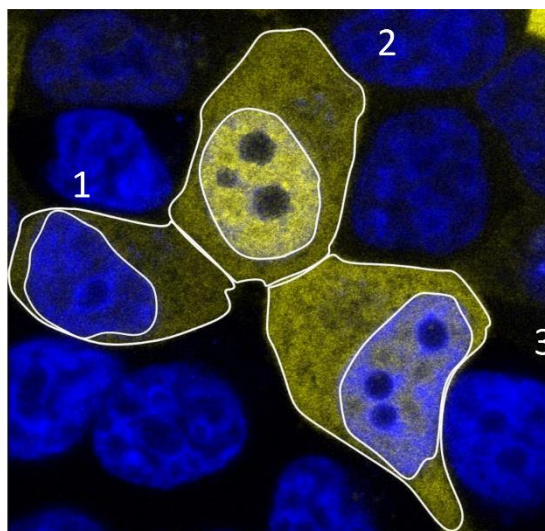

| Name           | Area<br>nm <sup>2</sup> | EYFP Intensity |
|----------------|-------------------------|----------------|
| Nucleus (1)    | 125434680               | 17,9864225     |
| Whole Cell (1) | 252944319               | 29,0213524     |
| Nucleus (2)    | 150911716               | 110,42257      |
| Whole Cell (2) | 373884979               | 82,7222964     |
| Nucleus (3)    | 389364605               | 70,4138841     |
| Whole Cell (3) | 166839155               | 62,8621562     |

| Cell | Nucleus    | Whole Cell | Relative nucleus<br>intensity |
|------|------------|------------|-------------------------------|
| 1    | 17,9864225 | 29,0213524 | 0,61976514                    |
| 2    | 110,42257  | 82,7222964 | 1,33485862                    |
| 3    | 62,8621562 | 70,4138841 | 0,89275229                    |

**Supplementary Figure S1: Representative example of the assessment of relative nucleus intensity.** The nucleus and the whole cells are marked as region of interest (ROI) by using ZEN 2012 blue edition. The relative nuclear intensity is

determined by the mean fluorescence intensity of the nucleus divided by the mean fluorescence intensity of the whole cell  
(a) Immunofluorescence images of AHR in MCF 7<sup>WT</sup>. (b) EYFP-AHR<sup>WT</sup> in transiently transfected in MCF 7<sup>ΔAHR</sup> cells.

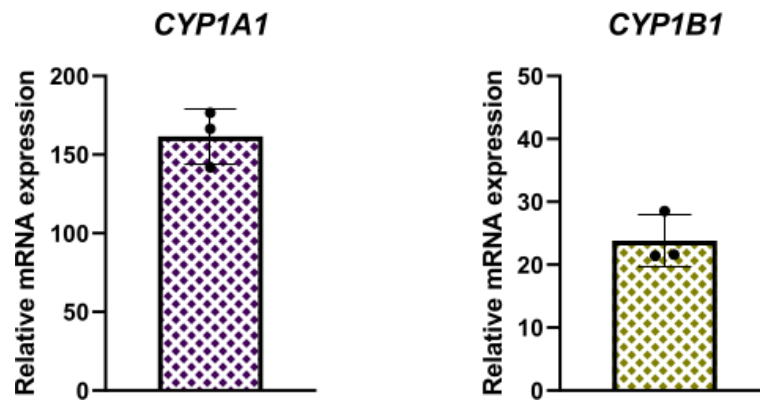

**Supplementary Figure S2: Relative *CYP1A1* and *CYP1B1* in EYFP-AHR<sup>WT</sup> transfected MCF-7<sup>ΔAHR</sup> cells.** Cells were treated with 2.5  $\mu$ M IND or 0.1% DMSO for 2 h. Relative *CYP1A1* and *CYP1B1* mRNA levels determined by qPCR. Values were standardized against HPRT and normalized to sample treated with DMSO only.

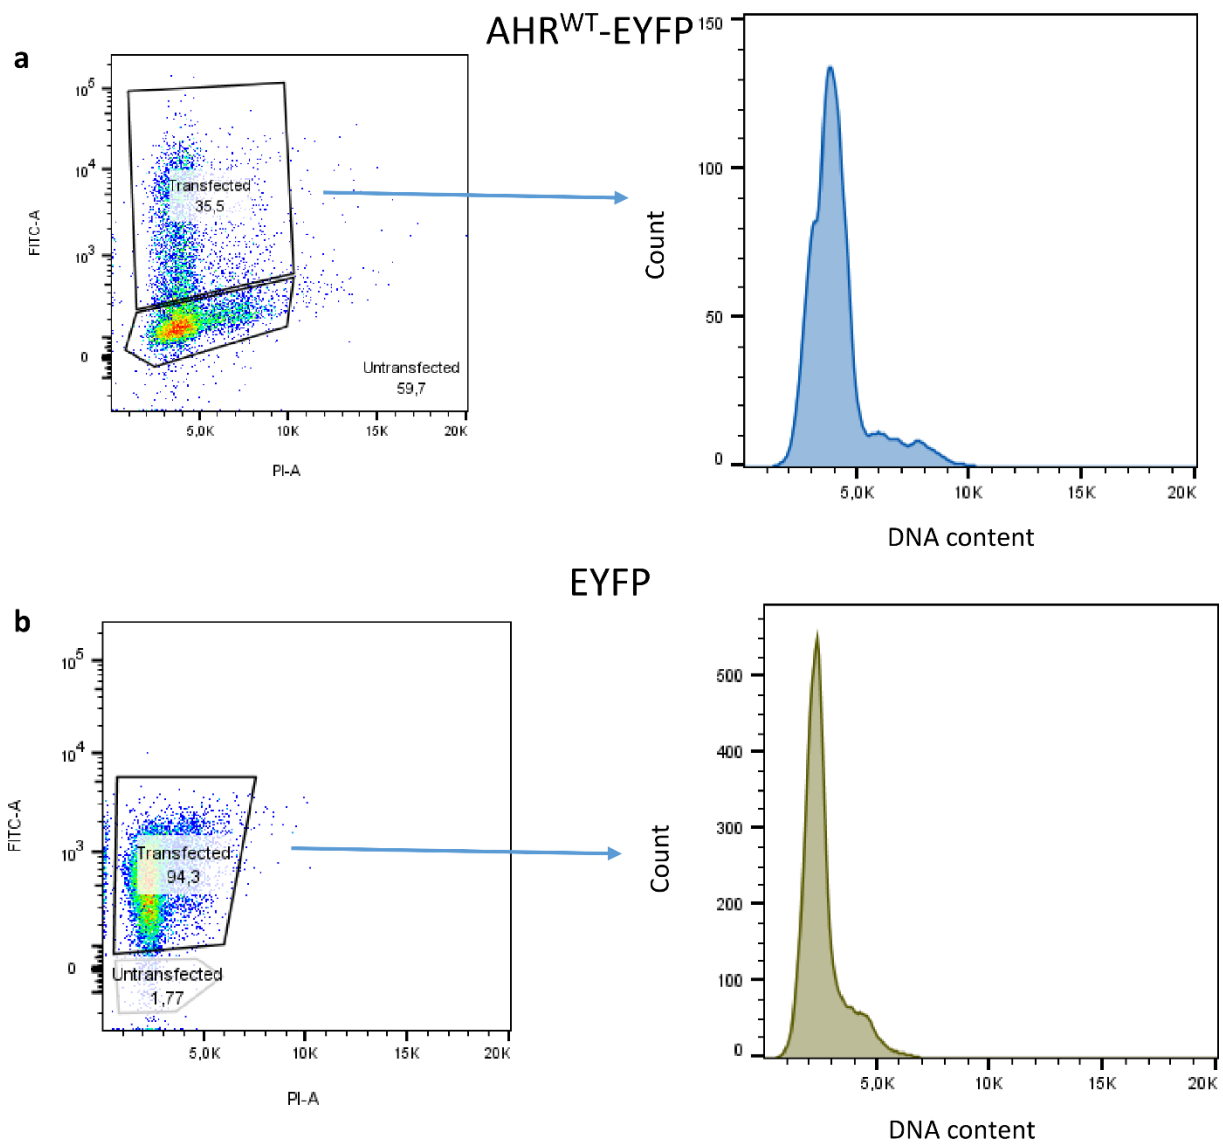

**Supplementary Figure S3: Cell cycle analysis of (a) EYFP-AHR transfected and (b) EYFP-transfected cells. Total number of analyzed cells: 3573(a), 9715(b).**

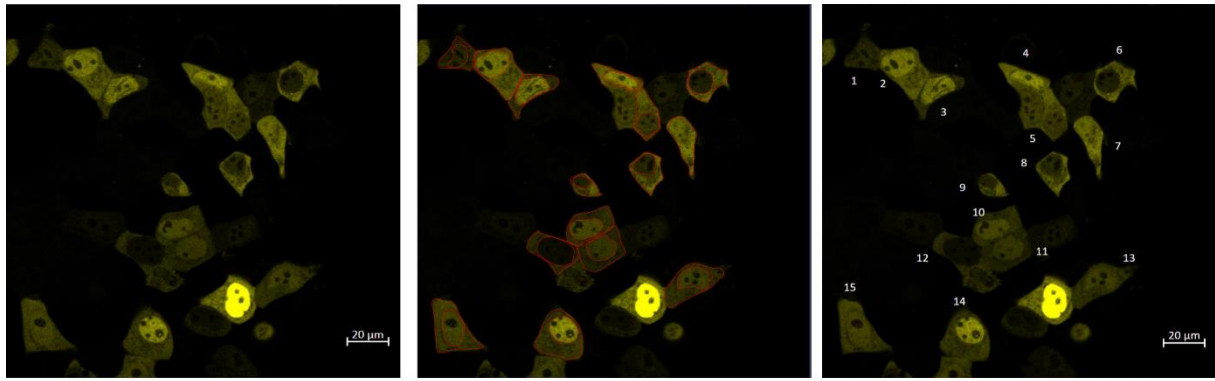

| Cell | Nucleus     | Whole Cell  | Relative nucleus intensity | Localization      |
|------|-------------|-------------|----------------------------|-------------------|
| 1    | 32,60259089 | 31,00435768 | 1,051548664                | Equal distributed |
| 2    | 94,34107402 | 79,82384993 | 1,181865747                | Nuclear           |
| 3    | 92,80375147 | 72,89917012 | 1,273042633                | Nuclear           |
| 4    | 112,2188771 | 95,00307161 | 1,181213146                | Nuclear           |
| 5    | 48,92213533 | 60,3714155  | 0,81035263                 | Cytoplasmic       |
| 6    | 31,65004156 | 52,62605932 | 0,601413862                | Cytoplasmic       |
| 7    | 88,76074435 | 86,60516028 | 1,024889788                | Equal distributed |
| 8    | 36,46220615 | 55,885867   | 0,652440556                | Cytoplasmic       |
| 9    | 34,46927374 | 50,1973051  | 0,686675782                | Cytoplasmic       |
| 10   | 58,87929677 | 48,69960793 | 1,209030201                | Nuclear           |
| 11   | 47,60108884 | 38,58784858 | 1,233577164                | Nuclear           |
| 12   | 13,51727057 | 20,60690953 | 0,655958165                | Cytoplasmic       |
| 13   | 50,89350269 | 44,7212931  | 1,138015007                | Nuclear           |
| 14   | 104,8081382 | 67,04128846 | 1,56333717                 | Nuclear           |
| 15   | 55,51982571 | 52,75499381 | 1,052408913                | Equal distributed |

**Supplementary Figure S4: Representative example of determining the localization of EYFP-AHR<sup>WT</sup>.** MCF7<sup>ΔAHR</sup> cells transfected with EYFP-AHR<sup>WT</sup>. In the basal state, fifteen cells were selected and the relative intensity of the nucleus of each cell was measured. The localization of AHR was assigned according to our classification in Fig2h.

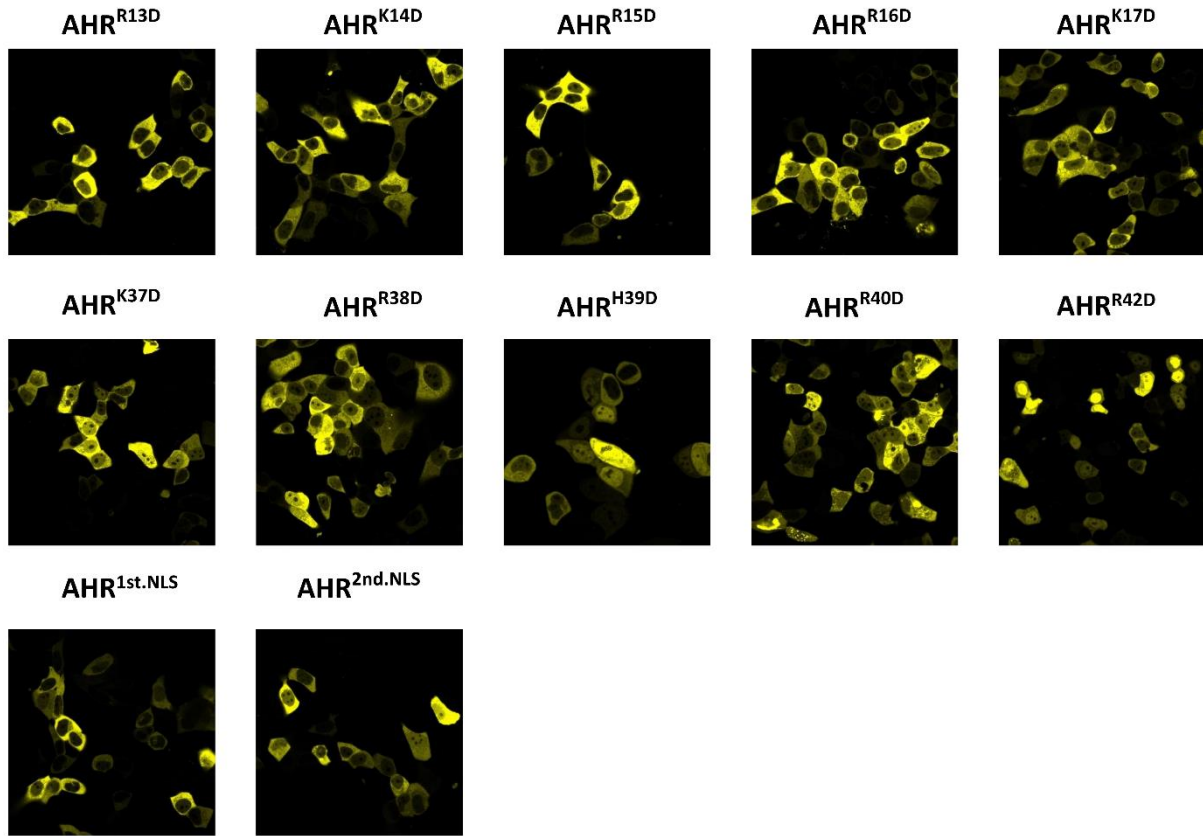

Supplementary Figure S5: Representative images of MCF7<sup>AHR</sup> cells transfected with EYFP-AHR<sup>mut</sup> in the basal state.

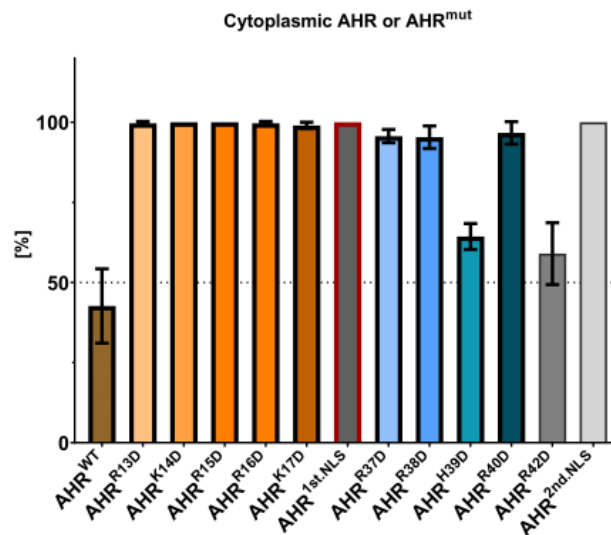

Supplementary Figure S6: The percentage of cells with cytoplasmic AHR<sup>WT</sup> or AHR<sup>mut</sup> for hundred randomly chosen cells according to our classification in Fig S2 and in Fig2h.

Min 1

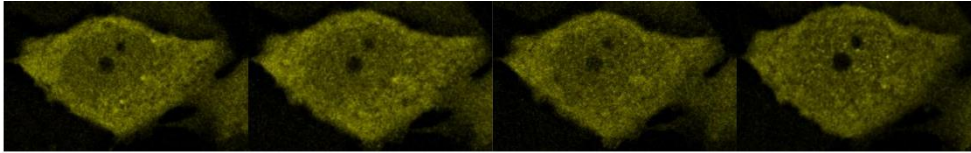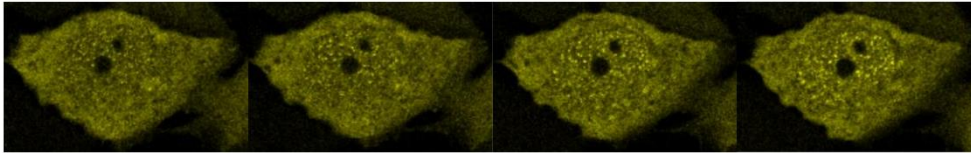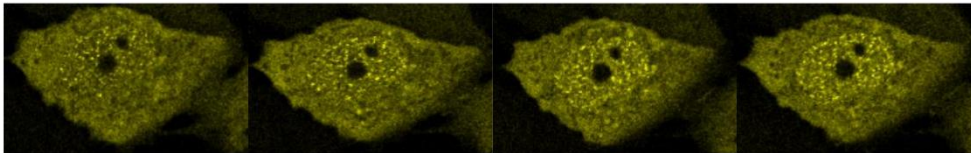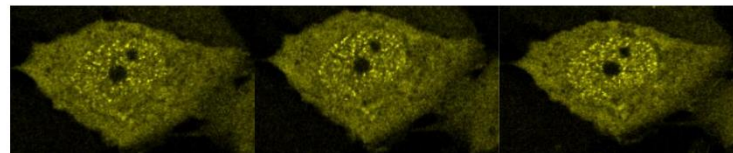

+10µM  
IND

15 min

Min 15

| Time | Nucleus    | Whole Cell | Relative Nucleus Intensity |
|------|------------|------------|----------------------------|
| 1    | 9,21553719 | 10,4335161 | 0,88326285                 |
| 2    | 9,01619835 | 10,1706648 | 0,88649056                 |
| 3    | 8,28793388 | 9,15421522 | 0,90536804                 |
| 4    | 10,7345455 | 10,9389993 | 0,98130964                 |
| 5    | 10,1682645 | 10,6222298 | 0,9572627                  |
| 6    | 10,7061157 | 10,8275074 | 0,98878858                 |
| 7    | 11,8244628 | 11,2050491 | 1,05527987                 |
| 8    | 12,6136489 | 11,3827964 | 1,1081327                  |
| 9    | 12,2879339 | 10,8430432 | 1,13325509                 |
| 10   | 12,7309091 | 11,2062828 | 1,13605102                 |
| 11   | 13,911405  | 11,6710075 | 1,19196264                 |
| 12   | 14,0634711 | 11,8881654 | 1,18298077                 |
| 13   | 13,5110744 | 11,1554718 | 1,21116118                 |
| 14   | 14,0502479 | 11,3701165 | 1,23571715                 |
| 15   | 15,2241322 | 11,5685858 | 1,31598905                 |

AHR<sup>WT</sup>

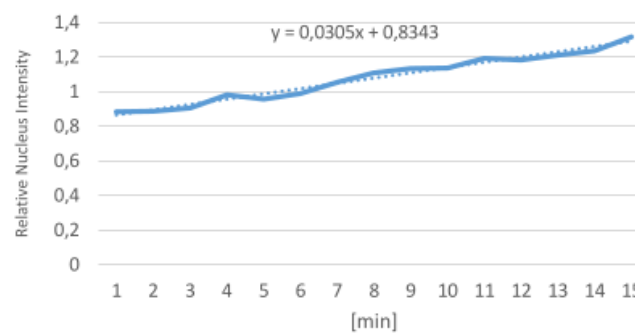

Slope of nuclear transition: 0,0305

**Supplementary Figure S7: Calculation of the slope of nuclear transition after treatment.** The representative example demonstrates the increase of relative nucleus intensity after cells treatment with 10 µM indirubin (IND) for 15 minutes. Fifteen snapshots of the cell are taken in ratio of one image per minute after treatment.

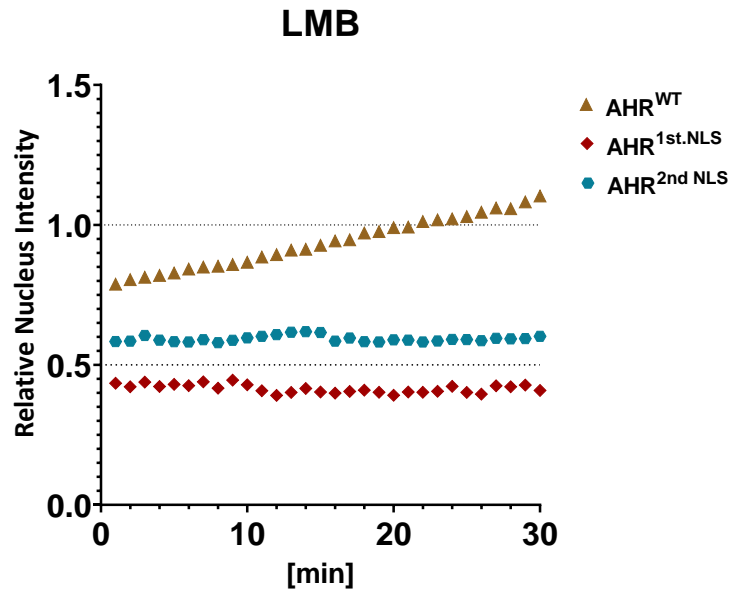

Supplementary Figure S8: Mean of time-lapse measurements after incubating cells transfected with AHR<sup>WT</sup> or AHR<sup>mut</sup> with 200 nM LMB for 30 min.

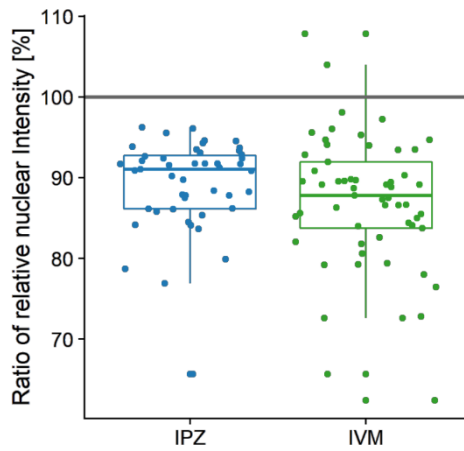

Supplementary Figure S9: Changes in the relative nuclear intensity after import inhibitors treatment. MCF7<sup>ΔAHR</sup> cells were transfected with EYFP-AHR<sup>WT</sup> and treated with importazole (IPZ) or ivermectin (IVM) for 90 min at concentrations of 10 μM and 17.5 μM, respectively. Changes in relative nuclear intensity of around 50 cells after 90 min of treatment are represented.
